# Supplementary material
Source: publisher figshare collection journal article supplement (https://acs.figshare.com/ndownloader/files/4484263)
Supplement: Supplementary file 1 [file 4484263]

## Supporting Information

### SI.1 Synthetic Process Flowchart

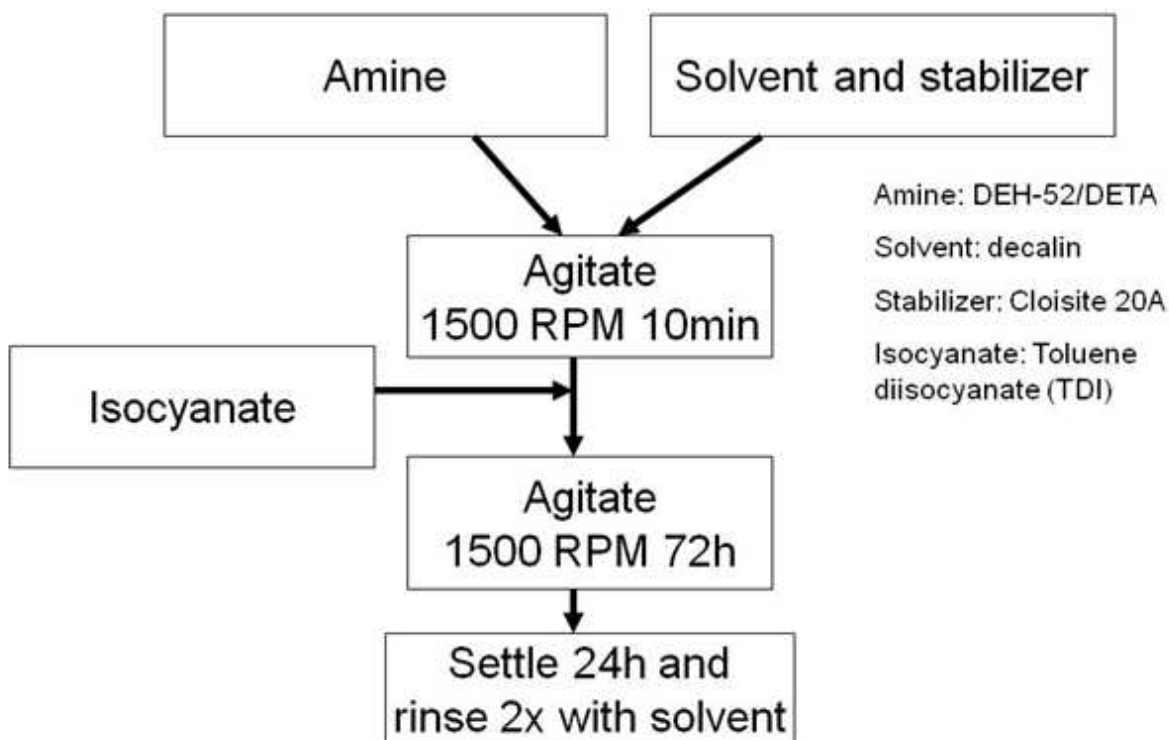

## SI.2 Rheological measurements of synthesis solutions.

Black markers indicate viscosities of continuous phase that were conducive to forming microcapsules. Microcapsules were not formed from continuous phases indicated by the white markers. Data sets are % PIB by mass in the continuous phase.

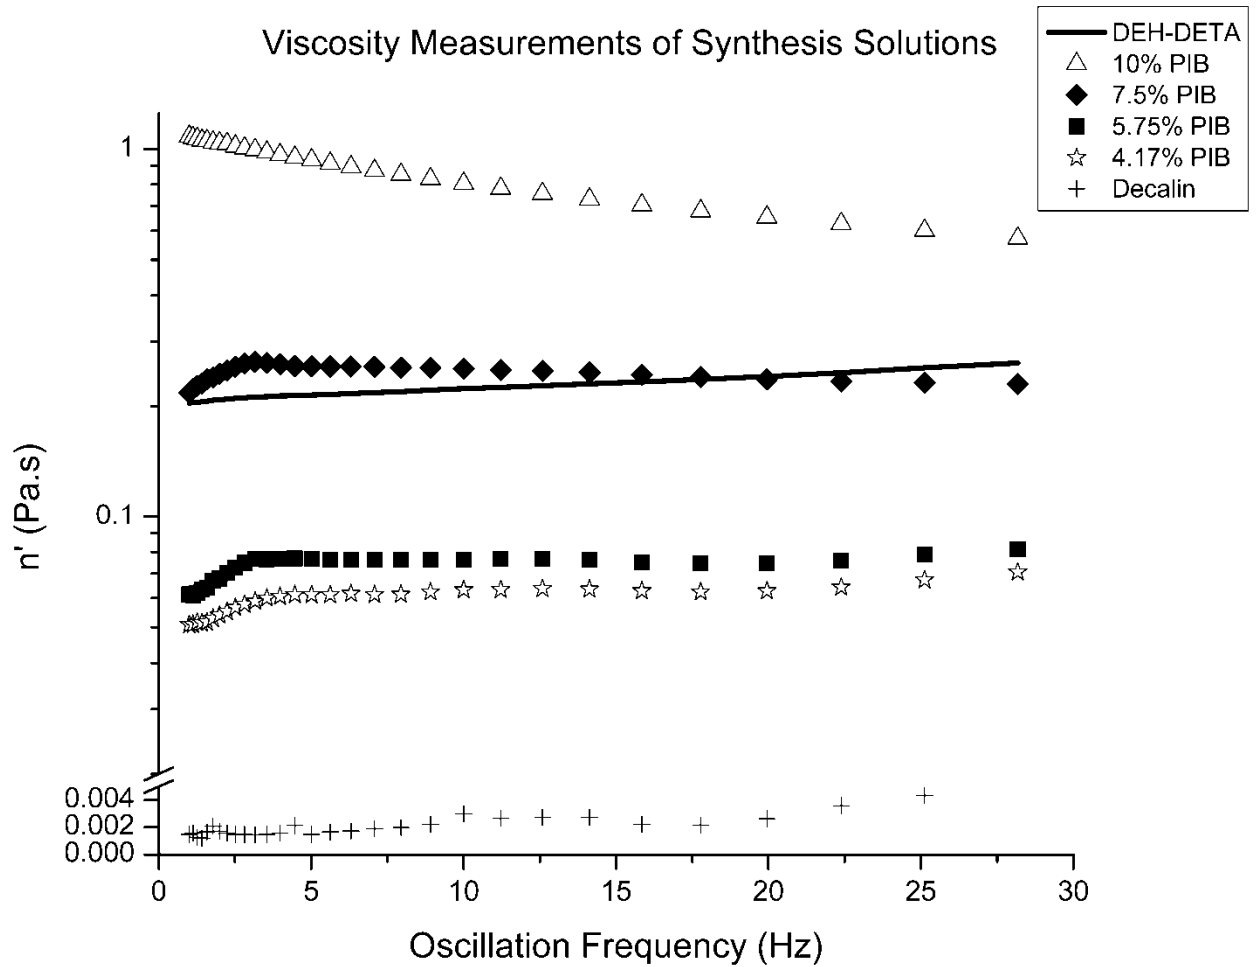

### SI.3 Summary of experiments performed

**Table SI.3. Experimental conditions and capsule quality**

| Experiment | [NH <sub>2</sub> ]/[NCO]<br>(eq:eq) | [nanoclay]<br>% | [PIB] % | Agitation<br>Rate<br>(RPM) | Capsule Quality                                        |
|------------|-------------------------------------|-----------------|---------|----------------------------|--------------------------------------------------------|
| 1          | 6:1                                 | 0.4             | 3.3     | 1500                       | Spherical                                              |
| 2          | 6:1                                 | 0               | 3.3     | 1500                       | Unable to be formed.                                   |
| 3          | 6:1                                 | 0.4             | 0       | 1500                       | Unable to be formed.                                   |
| 4          | 6:1                                 | 0.4             | 1.6     | 1500                       | Unable to be formed.                                   |
| 5          | 6:1                                 | 0.4             | 2.5     | 1500                       | Ovoid, many adhesions,<br>weaker shell wall            |
| 6          | 6:1                                 | 0.4             | 3.3     | 1750                       | Spherical, few adhesions                               |
| 7          | 12:1                                | 0.4             | 3.3     | 1500                       | Very weak shell wall,<br>unable to isolate and collect |

### SI.4 Representative DSC thermograms

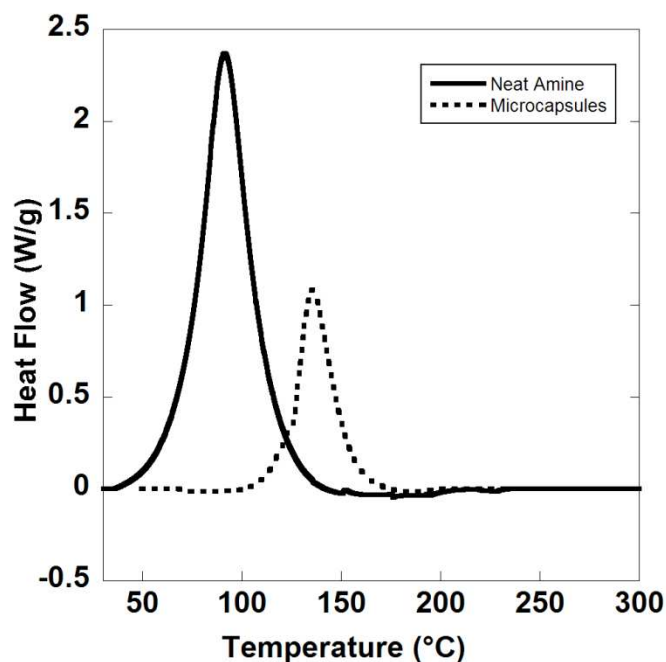

The reported heat of polymerization ( $\Delta H$ ) was 463 J/g for neat amine, and 97 J/g for microcapsules.
